# Letter

## **An unconventional NOI/RIN4 domain of a rice NLR protein binds host EXO70 protein to confer fungal immunity**

**Koki Fujisaki<sup>1</sup>, Yoshiko Abe<sup>1</sup>, Eiko Kanzaki<sup>1</sup>, Kazue Ito<sup>1</sup>, Hiroe Utsushi<sup>1</sup>,  
Hiromasa Saitoh<sup>2</sup>, Aleksandra Białas<sup>3</sup>, Mark J Banfield<sup>4</sup> Sophien Kamoun<sup>3</sup>, Ryohei  
Terauchi<sup>1,5</sup>**

### **Affiliation**

**1** Iwate Biotechnology Research Center, Kitakami, Iwate, Japan, **2** Department of Molecular Microbiology, Tokyo University of Agriculture, Setagaya, Tokyo, Japan, **3** The Sainsbury Laboratory, Norwich Research Park, Norwich, UK, **4** Dept. of Biological Chemistry, John Innes Centre, Norwich Research Park, Norwich, UK, **5** Laboratory of Crop Evolution, Kyoto University, Muko, Kyoto, Japan

A subset of plant nucleotide-binding domain and leucine-rich repeat-containing (NLR) proteins carry extraneous integrated domains that have been proposed to mediate pathogen effector recognition. The current view is that these unconventional domains function by directly binding or serving as substrates for pathogen effectors, yet only a few domains have been functionally characterized to date. Here we report that the integrated NOI domain of the rice NLR protein Pii-2, together with its partner Pii-1, mediates immunity to the rice blast fungus *Magnaporthe oryzae* by indirect recognition of the AVR-Pii effector. We discovered that the Pii-2 NOI domain does not physically interact with the effector itself but instead binds the host protein OsExo70-F3, which is a target of AVR-Pii. We further identified mutations within the NOI core motif (PxFGxW) of Pii-2 that abolish both OsExo70-F3 binding and *Pii*-mediated resistance to *M. oryzae* expressing AVR-Pii. This led us to propose a novel conceptual model in which an NLR-integrated domain functions to detect host proteins targeted by pathogen effectors, in a framework that extends classical indirect recognition models.

(174 words)

Plants have evolved immune receptors to defend against pathogen infection. These include cytosolic nucleotide-binding domain and leucine-rich repeat-containing (NLR) proteins that recognize pathogen avirulence (AVR) effectors and activate a complex immune response that includes hypersensitive cell death. Plant NLRs have a modular architecture comprising either an N-terminal coiled-coil (CC) or a Toll/interleukin-1 receptor (TIR) homology domain, followed by nucleotide binding (NB) and leucine rich

repeat (LRR) domains. To date, several reports have shown that genetically-linked NLR pairs (e.g., *RPS4/RPS1*, *RGA4/RGA5* and *Pikp-1/Pikp-2*) are required to act together for the recognition of cognate AVRs. Of these pairs, one NLR is a sensor NLR that perceives pathogen effectors while the other is a helper NLR that is necessary to activate immune signaling (ref. 1,2). A number of sensor NLRs, perhaps as many as 10%, have recently been reported to contain additional unconventional domains called integrated domains (IDs) that appear to have originated from host targets of effectors (ref. 3,4). The current view is that NLR-integrated domains function as baits or decoys that bind pathogen effectors or serve as substrates of effectors, in order to detect invading pathogens. One example is *Arabidopsis* RRS1, an NLR that carries a C-terminal domain with similarity to WRKY transcriptional factors. RRS1 is required for the perception of bacterial effectors PopP2 and AvrRps4, which are bacterial effectors that target *Arabidopsis* WRKY proteins to enhance virulence. Therefore, Le Roux *et al.* (2015) concluded that a WRKY domain targeted by pathogen effectors has integrated into RRS1 to facilitate recognition of the bacterial effectors (ref. 5,6). Other examples include the rice NLR pairs Pia (*RGA4/RGA5*) and Pikp (*Pikp-1/Pikp-2*), which recognize the effectors AVR-Pia and AVR-PikD of the rice blast fungus, *Magnaporthe oryzae* (syn. *Pyricularia oryzae*), respectively. Remarkably, both *RGA5* and *Pikp-1* include a Heavy Metal-Associated (HMA) domain integrated in different positions in these NLRs. Binding of the integrated HMA domain to the corresponding AVR effectors triggers the hypersensitive response and immunity to the blast fungus (ref. 7,8). These findings led to the proposal that unconventional integrated domains of

NLRs have evolved to directly bind pathogen effectors or serve as a substrate for the effectors's activity (ref. 9). As yet, the degree to which IDs associate with host proteins is largely unknown.

The *Pii* locus in rice encodes a pair of CC-NLR proteins, Pii-1 and Pii-2, that detect the *M. oryzae* effector AVR-Pii and mount an effective immune response against races of this pathogen that express AVR-Pii (ref. 10,11). Despite repeated attempts using various protein-protein interaction methods, we did not detect direct interaction between AVR-Pii and either one of Pii-1 and Pii-2 (ref. 12). Instead, we discovered that AVR-Pii binds two members of the large EXO70 protein family of rice, OsExo70F-2 and OsExo70F-3 (ref. 12). EXO70 is a subunit of the exocyst, an evolutionarily conserved vesicle tethering complex that functions in the last stage of exocytosis (ref. 13,14). Although we do not understand the degree to which AVR-Pii binding to EXO70 contributes to virulence, we found that *OsExo70-F3* is genetically required for *Pii*-mediated immunity to *M. oryzae* expressing *AVR-Pii* (ref. 12). This led us to propose that Pii response to AVR-Pii follows the indirect recognition model, in which the NLR protein recognizes modifications of a host protein targeted by the effector (ref. 12).

Here we report that Pii recognition of AVR-Pii follows a novel conceptual model of NLR perception of plant pathogens. We found that the 280 C-terminal amino acids of Pii-2 (Pii-2-CT) bind the rice protein OsExo70-F3 that is targeted by the AVR-Pii effector (Fig. 1, Supplementary Fig. 1, 2 and 3). We further delineated the interaction

region to the 103 amino acids at the C-terminus of the protein (Pii-2-CTC) (Supplementary Fig. 1, 2 and 3). Interestingly, this region of Pii-2 contains a short sequence with similarity to a core motif of nitrate-induced (NOI) domain (PxFGxW) that is also conserved in the *Pi5-2* which is allelic to *Pii-2* (Supplementary Fig. 3 and ref. 3,15). The NOI domain also defines the *Arabidopsis* RPM1-INTERACTING PROTEIN4 (RIN4), which is known to negatively regulate plant defense and is targeted by bacterial effectors AvrRpt2, AvrB and AvrRpm1 (ref. 16). In fact, the protease effector AvrRpt2 cleaves RIN4 protein at the NOI motif PxFGxW. To further investigate the importance of the Pii-2 NOI motif, we introduced multiple mutations in this region and tested the resulting mutants for binding to OsExo70-F3 (Fig.1, Supplementary Fig. 4). Mutations in the NOI conserved residues, Pro(P), Phe(F) and Trp(W) abolished binding to OsExo70-F3 (Fig. 1, Supplementary Fig. 4 and 5). This indicates that the Pii-2 NOI core motif is required for OsExo70-F3 binding.

Next, we investigated the role of the NOI motif in *Pii*-mediated immunity. We determined the effect of mutations within the NOI core motif on *Pii*-mediated resistance to *M. oryzae* using genetic complementation of a *pii-2* loss-of-function rice line with *Pii-2* transgenes carrying the mutations in the NOI motif described above. To obtain a *pii-2* loss-of-function mutant rice, we screened 5,600 ethyl methanesulfonate (EMS) mutant lines of rice cultivar Hitomebore, which carries the *Pii* gene (ref. 17). This led to the identification of two *pii-2* loss-of-function mutants, Hit5882 and Hit13701, carrying an amino acid substitution (V371D) and a nonsense mutation (Q247stop) in the Pii-2

NB-domain, respectively (Supplementary Fig. 3; ref. 11). A full-length cDNA of wild-type *Pii-2* under the control of the 35S promoter (Hit5882+WT-*Pii-2*) transformed in Hit5882 complemented *Pii*-mediated resistance (Fig. 2). In contrast, transformation of Hit5882 with a full-length cDNA of *Pii-2* carrying the NOI-m5 mutation failed to confer *Pii*-dependent resistance in all transgenic lines tested (Hit5882+*Pii-2*-NOI-m5; Fig. 2). The *Pii-2*-NOI-m5 mutant also failed to complement the second *Pii*-loss-of-function rice line Hit13701 (Supplementary Fig. 6). Overall, our data genetically link *Pii-2* NOI motif binding to OsExo70-F3 with *Pii*-mediated resistance to *M. oryzae* expressing the AVR-*Pii* effector. This suggests that NOI binding to EXO70 is crucial for *Pii* function.

The current view is that integrated domains of NLR immune receptors function by directly binding or serving as substrates for pathogen effectors. Our findings suggest that NLR-integrated domains may function by detecting host proteins targeted by pathogen effectors in a novel model in which an integrated domain of an NLR mediates indirect recognition of a pathogen effector (ref. 18,19) (Fig. 3). We hypothesize that the rice NLR *Pii-2* has integrated a NOI domain originating from a host NOI-EXO70 complex targeted by AVR-*Pii*. This NOI integration has enabled *Pii* to monitor OsExo70-F3 *via* physical interaction, which allowed indirect detection of AVR-*Pii* (Fig. 3). Recent reports showing RIN4-EXO70 interactions (ref. 20,21) support this hypothesis.

Our work also points to the NOI-EXO70 complex as a major target of plant pathogen effectors. These domains have therefore been acquired as sensor domains by NLR immune receptors, and both NOI and EXO70 are commonly seen integrated into NLRs (ref. 22, 23). Whether integrated NOI and EXO70 domains can mediate direct recognition of effectors remains to be determined. Nonetheless, our finding that NLR-integrated domains can indirectly detect AVR effectors expands the mechanistic view of pathogen detection by immune receptors—that the interactors of NLR-integrated domains can be either pathogen effectors, or host proteins that are targeted by effectors. This work shows the first example of indirect pathogen recognition *via* an integrated NLR, highlighting how the arms race between plants and pathogens has driven the emergence of a wealth of molecular interactions and mechanisms in the fight for survival.

## Methods

### Plasmids and Plants

The primers and their sequences used for plasmid constructions are listed in Supplementary Table 1. For Y2H assay, OsExo70-F3 in pGADT7 (prey vector), *Pii-1-CC*, *Pii-1-NB*, *Pii-1-LRR+CT*, *Pii-2-CC*, *Pii-2-NB* and *Pii-2-LRR+CT* in pGBKT7 (bait vector) have been previously constructed (ref. 17). To construct pGBKT7-*Pii-2-CT* and pGBKT7-*Pii-2-CTC*, *Pii-2-CT* and *Pii-2-CTC* fragments were amplified by PCR using primer sets: KF825f/KF826r and KF827f/KF826r, respectively, and inserted into pGBKT7 vector by utilizing *EcoRI* and *BamHI* sites. To prepare bait vectors of the *Pii-2-CT* mutant, *Pii-2-CT-m5*, the N-terminal half and the C-terminal half of *Pii-2-CT* fragment were amplified by using primer sets (KF825f/KF831r and KF830f/KF826r, respectively), and resulting PCR products were mixed and used as DNA template for second PCR using a primer set (KF825f /KF826r) to amplify *Pii-2-CT-m5* fragment. Similarly, to construct other pGBKT7-*Pii-2-CT* mutants, primer sets (1<sup>st</sup> PCR : KF825f/KF833r for *Pii-2-CT-VA-N* and KF832f/KF826r for *Pii-2-CT-VA-C*; KF825f/KF835r for *Pii-2-CT-PA-N* and KF834f/KF826r for *Pii-2-CT-PA-C*; KF825f/KF837r for *Pii-2-CT-FA-N* and KF836f/KF826r for *Pii-2-CT-FA-C*; KF825f/KF839r for *Pii-2-CT-GA-N* and KF838f/KF826r for *Pii-2-CT-GA-C*; KF825f/KF841r for *Pii-2-CT-WA-N* and KF840f/KF826r for *Pii-2-CT-WA-C*) were used for PCR to amplify the N- and C-terminal half fragments of *Pii-2-CT* mutants. The N- and C-terminal half fragments of each *Pii-2-CT* mutants were mixed and used as DNA template for second PCR using a primer set (KF825f /KF826r).



After the second PCR, the resulting 0.85 kb PCR products were inserted into pGBKT7 vector by utilizing *EcoRI* and *BamHI* sites.

For preparing the expression vectors in rice, full-length coding sequences of *Pii-2* was amplified from cDNA by PCR using primer set, KF828f/KF829r, and was introduced into pCAMBIA1300S vector (Cambia, [www.cambia.org](http://www.cambia.org)) by utilizing *KpnI* and *XbaI* sites (pCAMBIA-Pii-2). To construct expression vector for Pii-2 mutant (Pii-2-NOI-m5), two *Pii-2* fragments were amplified by using primer sets (KF828f/KF831r and KF830f/KF829r, respectively), and resulting PCR products were mixed and used as DNA template for the second PCR using a primer set (KF828f /KF829r) to amplify *Pii-2-NOI-m5* fragment. The *Pii-2-NOI-m5* fragment was inserted into pCAMBIA1300S vector (Cambia, [www.cambia.org](http://www.cambia.org)) by utilizing *KpnI* and *XbaI* sites (pCAMBIA-Pii-2-NOI-m5).

To prepare transgenic rice plants expressing wild-type *Pii-2* and mutant *Pii-2* (Pii-2-NOI-m5), pCAMBIA-Pii-2 and pCAMBIA-Pii-2-NOI-m5 were introduced into *Agrobacterium tumefaciens*, which were used for transformation of Hit5882 and Hit13701 that are *pii-2* deficient mutants of the rice cultivar Hitomebore (ref. 11).

### **Yeast two-hybrid assay**

Y2H assay was performed as described previously (ref. 24). Ten-times dilution series [OD600 = 3.0 (x1), 0.3 (x10<sup>-1</sup>) and 0.03 (x10<sup>-2</sup>)] of yeast cells were prepared and spotted onto quadruple dropout medium (QDO); basal medium lacking Trp, Leu, Ade and His but containing 5-Bromo-4-Chloro-3-indolyl  $\alpha$ -D-galactopyranoside (X-a-gal)

(Clontech). To detect interactions, both QDO medium with or without 10 mM 3-amino-1,2,4-triazole (3AT) (Sigma) was used. Yeast cells were also spotted onto double dropout medium (DDO); basal medium lacking Trp, Leu to test cell viability. To check protein accumulation in yeast cells, yeast cells were propagated in liquid DDO at 30°C overnight. Forty mg yeast cells were collected and resuspended with 160 µl GTN + DC buffer [10% glycerol, 25mM Tris-HCl (pH 7.5), 150mM NaCl, 1 mM DTT and 1 tablet of complete EDTA-free (Roche, Basel Switzerland)]. Then, 160 µl of 0.6 N NaOH was added, mixed gently, and incubated at room temperature for 10 min. Next, 160 µl of gel sample buffer [40%(w/v) glycerol, 240 mM Tris-HCl pH 6.8, 8% (w/v) SDS, 0.04% (w/v) bromophenol blue, 400 mM DTT] was added and incubated at 95 °C for 5 min. After 20,000 x g centrifugation for 5 min, the supernatant was subjected to SDS-PAGE. Proteins expressed from bait and prey vectors were immunologically detected by using anti-Myc antibody (MBL, Nagoya, Japan) and anti-HA 3F10 (Roche), respectively.

### **Assays for fungal pathogenicity and gene expression**

Wild-type *M. oryzae* isolate Sasa2 (no AVR-Pii) is stored at Iwate Biotechnology Research Center, and a transgenic *M. oryzae* strain (Sasa2+AVR-Pii-s) was previously established as Sasa2(+22p:pex33) (ref. 17). Rice leaf blade spot inoculation with conidial suspension ( $5 \times 10^5$  conidia/ml) was performed as described previously (ref. 24). Disease lesions were photographed at 10 days after inoculation, and vertical length of the lesions was measured. To check *Pii-2* expression in transgenic rice plants,

semi-quantitative RT-PCR was performed as described previously (ref.12). Messenger RNA from *Pii-2* transgene but not from intrinsic gene was specifically detected by using a primer set (5'-CTTTCGCGAGCTCGGTACCAACAATG-3' and 5'-ATCCACATCATTTTGTAACAATAG-3'). As a control, rice *Actin* was detected by using a primer set (5'- CTGAAGAGCATCCTGTATTG -3' and 5'- GAACCTTTCTGCTCCGATGG -3').

## References

1. Baggs, E., Dagdas, G. and Krasileva, KV. (2017) [NLR diversity, helpers and integrated domains: making sense of the NLR IDentity](#). *Curr. Opin. Plant Biol.* 38, 59-67.
2. Cesari, S.(2017) [Multiple strategies for pathogen perception by plant immune receptors](#). *New Phytol.* doi:10.1111/nph.14877.
3. Cesari, S., Bernoux, M., Moncuquet, P., Kroj, T. and Dodds, P.N. (2014) [A novel conserved mechanism for plant NLR protein pairs: the "integrated decoy" hypothesis](#). *Front Plant Sci.* 5, 606.
4. Wu, C.H., Krasileva, K. V., Banfield, M. J., Terauchi, R., and Kamoun, S. (2015) The "sensor domains" of plant NLR proteins: more than decoys. *Front Plant Sci.* 6,134.
5. Le Roux, C., Huet, G., Jauneau, A., Camborde, L., Trémousaygue, D., Kraut, A., Zhou, B., Levailant, M., Adachi, H., Yoshioka, H., Raffaele, S., Berthomé, R., Couté, Y., Parker, J.E. and Deslandes, L. (2015) [A receptor pair with an integrated decoy converts pathogen disabling of transcription factors to immunity](#). *Cell.* 161, 1074-1088.
6. Sarris, P.F., Duxbury, Z., Huh, S.U., Ma, Y., Segonzac, C., Sklenar, J., Derbyshire, P., Cevik, V., Rallapalli, G., Saucet, S.B., Wirthmueller, L., Menke, F.L., Sohn, K.H. and Jones, J.D. (2015) [A Plant Immune Receptor Detects Pathogen Effectors that Target WRKY Transcription Factors](#). *Cell.* 161, 1089-1100.

- 220 7. Cesari, S., Thilliez, G., Ribot, C., Chalvon, V., Michel, C., Jauneau, A., Rivas, S.,  
221 Alaux, L., Kanzaki, H., Okuyama, Y., Morel, J.B., Fournier, E., Tharreau, D.,  
222 Terauchi, R. and Kroj, T. (2013) [The rice resistance protein pair RGA4/RGA5](#)  
223 [recognizes the Magnaporthe oryzae effectors AVR-Pia and AVR1-CO39 by direct](#)  
224 [binding](#). *Plant Cell* 25, 1463-1481.
- 225 8. Maqbool, A., Saitoh, H., Franceschetti, M., Stevenson, C.E., Uemura, A., Kanzaki,  
226 H., Kamoun, S., Terauchi, R. and Banfield, M.J. (2015) [Structural basis of pathogen](#)  
227 [recognition by an integrated HMA domain in a plant NLR immune receptor](#). *Elife*.  
228 25, 4.
- 229 9. Kroj, T., Chanclud, E., Micel-Romiti, C., Grand, X. and Morel, JB. (2016)  
230 [Integration of decoy domains derived from protein targets of pathogen effectors into](#)  
231 [plant immune receptors is widespread](#). *New Phytol.* 210, 618-626.
- 232 10. Takagi, H., Uemura, A., Yaegashi, H., Tamiru, M., Abe, A., Mitsuoka, C., Utsushi,  
233 H., Natsume, S., Kanzaki, H., Matsumura, H., Saitoh, H., Yoshida, K., Cano, L.M.,  
234 Kamoun, S. and Terauchi, R. (2013) [MutMap-Gap: whole-genome resequencing of](#)  
235 [mutant F2 progeny bulk combined with de novo assembly of gap regions identifies](#)  
236 [the rice blast resistance gene Pii](#). *New Phytol.* 200, 276-283
- 237 11. Takagi, H., Abe, A., Uemura, A., Oikawa, K., Utsushi, H., Yaegashi, H., Shimizu,  
238 M., Abe, Y., Kanzaki, H., Saitoh, H., Terauchi, R. and Fujisaki, K. (2017) Rice blast  
239 resistance gene *Pii* is controlled by a pair of NBS-LRR genes *Pii-1* and *Pii-2*.  
240 *bioRxiv* doi. <https://doi.org/10.1101/227132>
- 241 12. Fujisaki, K., Abe, Y., Ito, A., Saitoh, H., Yoshida, K., Kanzaki, H., Kanzaki, E.,

- Utsushi, H., Yamashita, T., Kamoun, S. and Terauchi, R. (2015) [Rice Exo70 interacts with a fungal effector, AVR-Pii, and is required for AVR-Pii-triggered immunity](#). *Plant J.* 83, 875-887.
13. Heider, MR. and Muson, M. (2012) Exorcising the exocyst complex. *Traffic* 13, 898-907.
14. Zhang, Y., Liu, CM., Emons, AM. and Ketelaar, T. (2010) The plant exocyst. *J. Integr. Plant Biol.* 52, 138-146.
15. Nishimura, M.T., Monteiro, F. and Dangl, J.L. (2015) [Treasure your exceptions: unusual domains in immune receptors reveal host virulence targets](#). *Cell.* 161, 957-60.
16. Kim, M.G., da Cunha, L., McFall, A.J., Belkadir, Y., DebRoy, S., Dangl, J.L. and Mackey, D. (2005) [Two Pseudomonas syringae type III effectors inhibit RIN4-regulated basal defense in Arabidopsis](#). *Cell.* 121, 749-759.
17. Yoshida, K., Saitoh, H., Fujisawa, S., Kanzaki, H., Matsumura, H., Yoshida, K., Tosa, Y., Chuma, I., Takano, Y., Win, J., Kamoun, S. and Terauchi, R. (2009) [Association genetics reveals three novel avirulence genes from the rice blast fungal pathogen Magnaporthe oryzae](#). *Plant Cell* 21, 1573-1591
18. Dangl, J.L. and Jones, J.D. (2001) [Plant pathogens and integrated defence responses to infection](#). *Nature* 411, 826-833.
19. van der Hoorn, R.A. and Kamoun, S. (2008) [From Guard to Decoy: a new model for perception of plant pathogen effectors](#). *Plant Cell* 20, 2009-2017

263 20. Afzal,, A.J., Kim, J.H. and Mackey, D. (2013) [The role of NOI-domain containing](#)  
264 [proteins in plant immune signaling](#). *BMC Genomics*. 14, 327.

265 21. Sabol, P., Kullich, I. and Zarsky, V. (2017) RIN4 recruits the exocyst subunit  
266 EXO70B1 to the plasma membrane. *J. Exp. Bot.* 68, 3253-3265.

267 22.Sarris, PF., Cevik, V., Dagdas, G., Jones, JDG. And Krasileva, KV. (2016)  
268 Comparative analysis of plant immune receptor architectures uncovers host proteins  
269 likely targeted by pathogens. *BMC Biol.* 14, 8.

270 23.Brabham, HJ., Hernández-Pinzón I., Hoden, S., Lorang, J. and Moscou, MJ. (2017)  
271 An ancestral integration at Mla is maintained as a *trans*-species polymorphism.  
272 BioRxiv.

273 24. Kanzaki, H., Yoshida, K., Saitoh, H., Fujisaki, K., Hirabuchi, A., Alaux, L., Fournier,  
274 E., Tharreau, D. and Terauchi, R. (2012) Arms race co-evolution of *Magnaporthe*  
275 *oryzae* AVR-Pik and rice *Pik* genes driven by their physical interactions. *Plant J.* 72,  
276 894–907.

277 25. Lee, SK., Song, MY., Seo, YS., Kim, HK., Ko, S., Cao, PJ., Suh, JP., Yi, G., Roh,  
278 JH., Lee, S., An, G., Hahn, TR., Wang, GL., Ronald, P. and Jeon, JS. (2009) Rice  
279 Pi5-mediated resistance to *Magnaporthe oryzae* requires the presence of two  
280 coiled-coil-nucleotide-binding-leucine-rich repeat genes. *Genetics*. 181, 1627–1638.

281

282

283

284

## Acknowledgements

We thank members of our lab for discussions and general assistance. We also thank Matt Moscow and Helen Brabham, The Sainsbury Laboratory, UK for sharing their unpublished results. This work was supported by Science and Technology Research Promotion Program for Agriculture, Forestry, Fisheries and Food Industry, Japan, Grant-in-aid for MEXT (Scientific Research on Innovative Areas 23113009), JSPS KAKENHI (Grant No. 26850029) and JSPS KAKENHI 15H05779, the Biotechnology and Biological Sciences Research Council (BBSRC, UK, grants BB/J00453 and BB/P012574).

## Contributions

K.F. S.K. and R.T. initiated, conceived and coordinated the project; K.F. identified and characterized NOI core motif in Pii-2; E.K. generated transgenic rice plants; K.F., Y.A. and H.U. prepared plamid vectors and performed fungal infection assay and RT-PCR. K.F. and K.I. performed yeast two hybrid assay. H.S., M.B., S.K. and R.T. supervised the project; K.F., A.B., S.K., and R.T. wrote the manuscript

## Competing interests

The authors declare no competing financial interests.

## Corresponding author

Co-correspondence to Ryohei Terauchi and Koki Fujisaki.



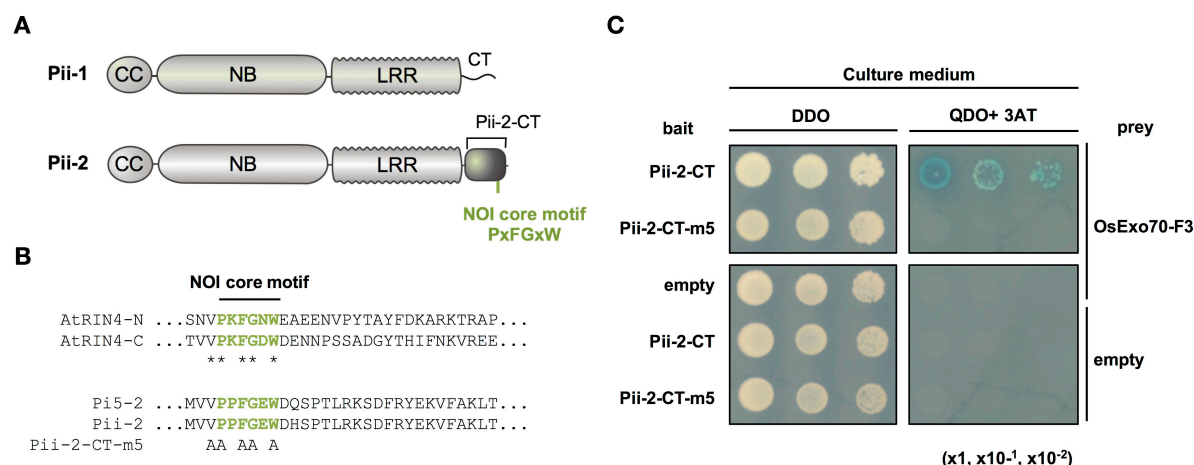

**Figure 1. OsExo70-F3 binds the NOI domain of Pii-2 C-terminal region (Pii-2-CT).**

(A) A schematic diagram of Pii-1 and Pii-2 NLRs. Coiled-coil (CC), nucleotide-binding (NB) and leucine rich repeat (LRR) domains are shown in light grey. OsExo70-F3 binds the C-terminus of the Pii-2 (Pii-2-CT) shown in dark grey (Pii-2-CT) that contains the core motif (PxFGxW) of NOI domain.

(B) Alignment of amino acid sequences around the NOI core motif of *Arabidopsis* RIN4, rice Pi5-2 and Pii-2 proteins. Residues of the NOI core motif are shown in green. Asterisks indicate conserved amino acids among *Arabidopsis* RIN4, Pi5-2 and Pii-2 proteins, which are substituted for Ala (A) in the Pii-2-CT-m5 mutant.

(C) Yeast two hybrid (Y2H) assay showing the interaction of OsExo70-F3 with the wild-type Pii-2-CT but not with the Pii-2-CT-m5 mutant. Protein interactions were tested in the yeast grown on Quadruple dropout (QDO) + 3AT medium (Trp<sup>-</sup>Leu<sup>-</sup>Ade<sup>-</sup>His<sup>-</sup>X $\alpha$  gal<sup>+</sup> +10 mM 3AT : right panels). Viability of all transformed yeast cells were demonstrated by growing them on double dropout (DDO) medium (Trp<sup>-</sup>Leu<sup>-</sup> : left panels). Yeast cells were spotted onto the media as tenfold dilution series (x1, x10<sup>-1</sup>, x10<sup>-2</sup>). Empty vectors (labeled as “empty”) were used as negative controls.

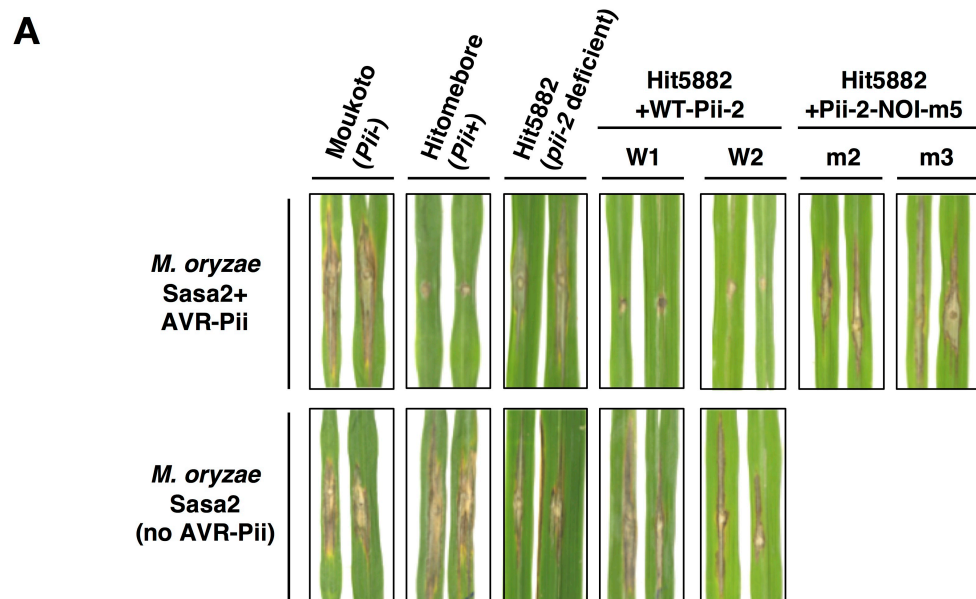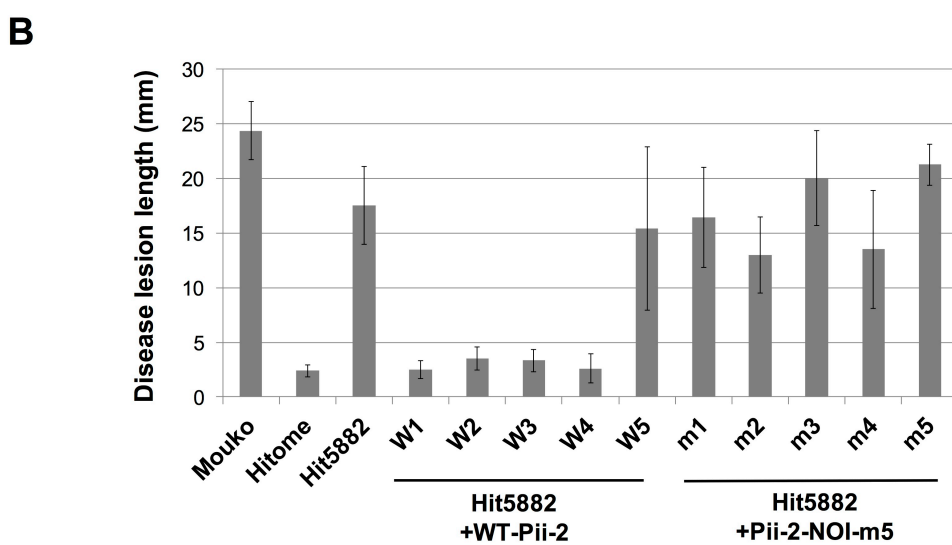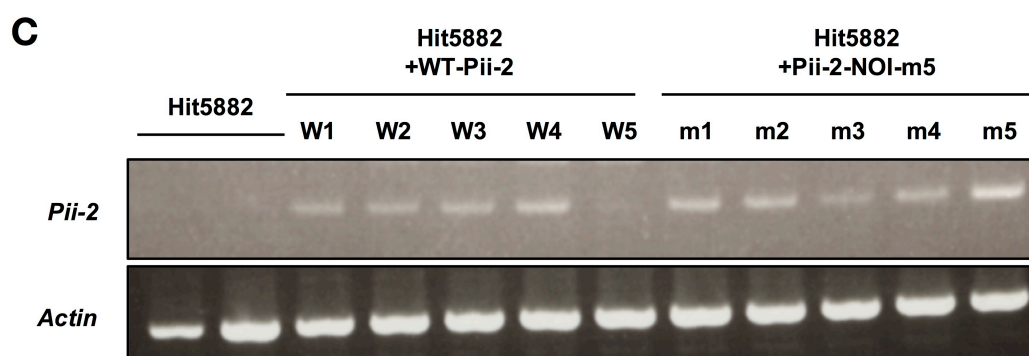

**Figure 2. AVR-Pii recognition of Pii requires Pii-2 NOI core motif.**

(A) Results of rice leaf blade spot inoculation assay of *M. oryzae*. Two *M. oryzae* isolates, with (transgenic Sasa2+AVR-Pii; top) or without (Sasa2; bottom) AVR-Pii were spot inoculated onto the leaves of rice lines Moukoto (Pii-), Hitomebore (Pii+), Hit5882, a *pii-2* Hitomebore mutant, and transgenic Hit5882 lines expressing a full-length cDNA of the wild-type *Pii-2* (Hit5882+WT-Pii-2) and those expressing the mutant version of *Pii-2* with m5 mutation in the NOI core motif (Hit5882+Pii-2-NOI-m5). Representative data of two line each of Hit5882+WT-Pii-2 (W1 and W2) and Hit5882+Pii-2-NOI-m5 (m2 and m3) are shown.

(B) Bar graphs showing disease lesion lengths after inoculation of an *M. oryzae* isolate Sasa2+AVR-Pii onto rice lines from panel A, labelled on the bottom. Here, five lines each from Hit5882+WT-Pii-2 (W1 to W5) and Hit5882+Pii-2-NOI-m5 (m1 to m5) were tested. The graph illustrates average lesion lengths and standard deviations from six inoculated spots per line.

(C) Expression of *Pii-2* transgenes in the tested rice plants. Messenger RNA from *Pii-2* transgene but not from intrinsic gene was specifically detected by semi-quantitative RT-PCR using a combination of primers derived from *Pii-2* gene and the binary vector sequences. Rice *Actin* was used as control.

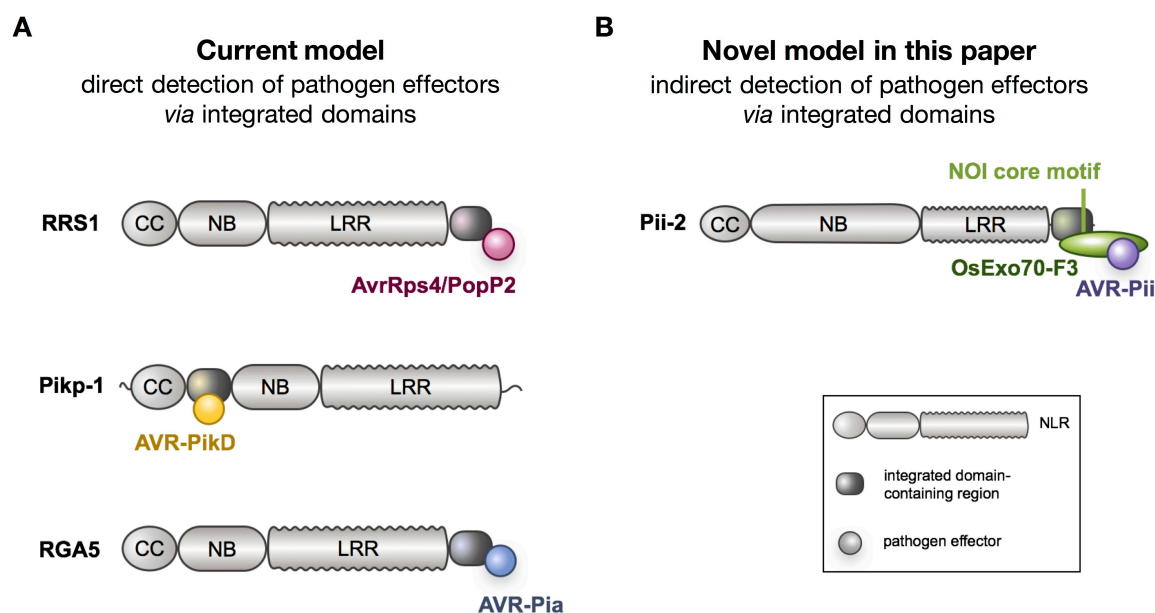

**Figure 3. A scheme showing possible roles of NLR-integrated domains in the effector recognition.**

(A) A widely accepted model of NLR-ID function. NLR directly interacts with pathogen effector *via* its integrated domain, and subsequently activates immune response. An *Arabidopsis* sensor NLR, RRS1 (top), has the WRKY domain at the C-terminus, and bacterial effectors AvrRps4/PopP2 directly bind to the RRS1 WRKY ID (ref. 5,6). The rice sensor NLRs, Pikp-1 (middle) and RGA5 (bottom), carry integrated HMA domain. Pathogen AVR effectors AVR-PikD and AVR-Pia, respectively, directly bind to their cognate HMA (ref. 7,8). In the current model (ref. 1,2), these sensor NLRs trigger ETI together with their NLR helpers.

(B) A novel model of ID function in indirect detection of pathogen effectors. Pii-2 is an NLR with an ID, NOI core motif (PxFGxW), residing in its C-terminal region. Pii-2-ID directly binds OsExo70-F3, which is necessary for AVR-Pii recognition. OsExo70-F3 also binds AVR-Pii. We propose that Pii-2 monitors OsExo70-F3, the status of which is altered upon binding of AVR-Pii. Thus, Pii-2 ID guards a host protein, OsExo70-F3, that is targeted by a pathogen effector, AVR-Pii.
